# Supplementary material for: Chitinase genes from Metarhizium anisopliae for the control of whitefly in cotton
Source: R Soc Open Sci. 2019 Aug 28;6(8):190412. doi: 10.1098/rsos.190412 (PMC6731705; doi:10.1098/rsos.190412)
Supplement: Chitinase Activity of Transformed Cotton Plants [file rsos190412supp3.xlsx]

## Sheet: Sheet1
	Name of chitinase
	Total chitinase activity of transformed plants (U/mL)								Chitinase activity in control (U/mL)								Net chitinase activity (U/mL)
	Replicate	Mean	P1	P2	P3	P4	Average		Replicate	Mean	P1	P2	P3	P4	Average		Replicate	Mean	P1	P2	P3	P4	Average
	R1	5.43	5.39	5.47	5.42	5.44	5.43		R1	5.19	5.23	5.2	5.15	5.17	5.1875		R1	0.41	0.45	0.39	0.38	0.41	0.4075
	R2	5.64	5.59	5.72	5.61	5.63	5.6375		R2	5.16	5.13	5.12	5.19	5.21	5.1625		R2	0.49	0.41	0.47	0.53	0.55	0.49
	R3	5.73	5.59	5.69	5.85	5.79	5.73		R3	5.01	4.95	5.09	5.03	4.98	5.0125		R3	0.47	0.41	0.53	0.44	0.49	0.4675
	R4	5.41	5.43	5.48	5.41	5.33	5.4125		R4	5.11	5.04	5.09	5.17	5.13	5.1075		R4	0.43	0.49	0.41	0.47	0.37	0.435
	R5	5.52	5.57	5.48	5.46	5.57	5.52		R5	4.99	4.89	5.07	5.03	4.98	4.9925		R5	0.52	0.51	0.59	0.53	0.46	0.5225
	Average	5.546							Average	5.092							Average	0.464
	Chit1 of M. anisopliae (TN-25)	5.55							Chit1 of M. anisopliae (TN-25)	5.09							Chit1 of M. anisopliae (TN-25)	0.46
	Replicate	Mean	P1	P2	P3	P4	Average		Replicate	Mean	P1	P2	P3	P4	Average		Replicate	Mean	P1	P2	P3	P4	Average
	R1	5.03	4.99	5.01	5.05	5.07	5.03		R1	5.17	5.13	5.17	5.21	5.18	5.1725		R1	0.01	0.01	0.02	0.01	0.01	0.0125
	R2	5.21	5.26	5.21	5.17	5.19	5.2075		R2	5.01	5.03	5.08	4.93	5.01	5.0125		R2	0.07	0.05	0.06	0.09	0.07	0.0675
	R3	5.15	5.19	5.17	5.11	5.12	5.1475		R3	4.97	5.05	5.01	4.89	4.93	4.97		R3	0.05	0.03	0.07	0.05	0.06	0.0525
	R4	5.09	5.07	5.17	5.11	5.03	5.095		R4	5.09	5.19	5.01	5.04	5.13	5.0925		R4	0.06	0.05	0.04	0.09	0.06	0.06
	R5	5.18	5.23	5.19	5.14	5.17	5.1825		R5	5.23	5.29	5.23	5.17	5.22	5.2275		R5	0.03	0.04	0.05	0.01	0.02	0.03
	Average	5.132							Average	5.094							Average	0.044
	Mock	5.13							Mock	5.09							Mock	0.04
	Nymphs Mortality after 96 hours								Nymphs Mortality after 120 hours								Nymphs Mortality after 144 hours
	Replicate	Mean	P1	P2	P3	P4	Average		Replicate	Mean	P1	P2	P3	P4	Average		Replicate	Mean	P1	P2	P3	P4	Average
	R1	7.01	7.09	7.04	7.01	6.91	7.0125		R1	12.81	12.87	12.83	12.77	12.76	12.8075		R1	16.67	16.73	16.71	16.61	16.65	16.675
	R2	7.41	7.37	7.36	7.43	7.49	7.4125		R2	12.21	12.19	12.25	12.22	12.17	12.2075		R2	18.99	19.01	18.95	18.98	19.01	18.9875
	R3	10.69	10.78	10.67	10.69	10.63	10.6925		R3	9.67	9.7	9.67	9.69	9.63	9.6725		R3	19.81	19.89	19.81	19.75	19.79	19.81
	R4	10.01	9.97	10.05	10.03	10	10.0125		R4	10.07	10.11	10.07	10.05	10.04	10.0675		R4	19.69	19.61	19.75	19.69	19.71	19.69
	R5	8.61	8.67	8.59	8.61	8.58	8.6125		R5	9.57	9.53	9.61	9.55	9.58	9.5675		R5	16.71	16.77	16.72	16.66	16.69	16.71
	Average	8.746							Average	10.866							Average	18.374
	Chit1 of M. anisopliae (Tn-25)	8.75							Chit1 of M. anisopliae (Tn-25)	10.86							Chit1 of M. anisopliae (Tn-25)	18.37
									Adults Mortality after 120 hours								Adults Mortality after 144 hours
									Replicate	Mean	P1	P2	P3	P4	Average		Replicate	Mean	P1	P2	P3	P4	Average
	Table 2: Chitinase Activity of Transformed Cotton Plants								R1	1.83	1.79	1.75	1.89	1.88	1.8275		R1	8.11	8.07	8.09	8.12	8.15	8.1075
									R2	1.46	1.49	1.43	1.41	1.53	1.465		R2	11.34	11.37	11.34	11.35	11.31	11.3425
	Name of chitinase	Total chitinase activity of transformed plants (U/mL)	Chitinase activity in control (U/mL)	Net chitinase activity (U/mL)					R3	4.21	4.18	4.2	4.21	4.25	4.21		R3	8.03	8.01	8.04	8.02	8.06	8.0325
	R1	5.43	5.19	0.41					R4	5.3	5.35	5.33	5.31	5.22	5.3025		R4	9.51	9.56	9.53	9.49	9.45	9.5075
	R2	5.64	5.16	0.49					R5	4.38	4.34	4.39	4.35	4.43	4.3775		R5	11.25	11.19	11.23	11.25	11.32	11.2475
	R3	5.73	5.01	0.47					Average	3.436							Average	9.648
	R4	5.41	5.11	0.43					Chit1 of M. anisopliae (Tn-25)	3.44							Chit1 of M. anisopliae (Tn-25)	9.65
	R5	5.52	4.99	0.52
	Average	5.546	5.092	0.464
	Chit1 of M. anisopliae	5.55	5.09	0.46
	(Tn-25)
	R1	5.03	5.17	0.01
	R2	5.21	5.01	0.07
	R3	5.15	4.97	0.05
	R4	5.09	5.09	0.06
	R5	5.18	5.23	0.03
	Average	5.132	5.094	0.044
	Mock	5.13	5.09	0.04	n=5.
